# Supplementary material for: Evolution of Angiogenic Factors in Pregnant Patients with Breast Cancer Treated with Chemotherapy
Source: MDPI journal article supplement (doi:10.3390/cancers13040923), 2021-02-23
Supplement: s1 [file s1]

**Table S1. Baseline characteristics of 12 patients with breast cancer diagnosed during pregnancy.**

| Variable                         | No. (%)    |
|----------------------------------|------------|
| Age, years, mean (range)         | 37 (30-43) |
| Trimester of gestation           |            |
| First                            | 5 (42)     |
| Second                           | 5 (42)     |
| Third                            | 2 (16)     |
| Mammography, BI-RADS category    |            |
| 0                                | 1 (8)      |
| 1                                | 2 (17)     |
| 2                                | 0          |
| 3                                | 0          |
| 4                                | 3 (25)     |
| 5                                | 1 (8)      |
| 6                                | 5 (42)     |
| Ultrasound                       |            |
| Suspicious findings              | 12 (100)   |
| Clinical staging                 |            |
| 0                                | 0          |
| I                                | 0          |
| IA                               | 3 (25)     |
| IB                               | 1 (8)      |
| IIA                              | 4 (34)     |
| IIB                              | 3 (25)     |
| III                              | 0          |
| IV                               | 1 (8)      |
| Histological grade               |            |
| 1                                | 0          |
| 2                                | 3 (25)     |
| 3                                | 9 (75)     |
| Immunohistochemistry             |            |
| Positive hormone receptors*      | 5 (42)     |
| HER2 overexpression <sup>‡</sup> | 5 (42)     |
| Triple negative                  | 4 (34)     |
| Histological type                |            |
| Infiltrating Ductal Carcinoma    | 11 (92)    |
| Infiltrating Lobal Carcinoma     | 1 (8)      |

\* Estrogen receptor and/or progesterone receptor score >1%

<sup>‡</sup> HercepTest positive (+++) or (++) and in situ hybridization (FISH or ISH) positive for HER2 following ASCO-CAP guidelines 2013.

**Table S2. Complications during gestation in 10 patients with breast cancer diagnosed during pregnancy. Two patients do not have any complication.**

| Case# | Complication                                  | GA | Treatment/outcome                                                                                                  | Relation with treatment | Comment                                                                            |
|-------|-----------------------------------------------|----|--------------------------------------------------------------------------------------------------------------------|-------------------------|------------------------------------------------------------------------------------|
| 2     | Fever                                         | 20 | Paracetamol.                                                                                                       | Possible                |                                                                                    |
|       | Constipation                                  | 16 | Laxant.                                                                                                            | Possible                |                                                                                    |
|       |                                               | 23 | Laxant (high dose).                                                                                                | Possible                |                                                                                    |
|       | Abnormal intrapartum fetal heart rate tracing | 37 | Intrapartum C-Section.                                                                                             | Possible                | False positive. Normal postnatal pH.                                               |
| 3     | Mucositis                                     | 25 | Viscous lidocaine.                                                                                                 | Yes                     |                                                                                    |
|       | Asthenia                                      | 26 | Non-specific treatment.                                                                                            | Possible                |                                                                                    |
|       | Anaemia                                       | 28 | Intravenous iron.                                                                                                  | Possible                |                                                                                    |
|       | Neutropenia                                   | 32 | Chemotherapy discontinuation.                                                                                      | Yes                     |                                                                                    |
|       | Preterm threatened labor                      | 32 | Admission. Tocolytic treatment administration and fetal lung maturation.                                           | Possible                | Chemotherapy-induced stress.                                                       |
|       | Preterm rupture of membranes                  | 35 | Admission and tocolytic treatment. Anticipation of termination of pregnancy.                                       | Possible                | Chemotherapy-induced stress.                                                       |
| 4     | Mucositis                                     | 36 | Viscous lidocaine.                                                                                                 | Yes                     |                                                                                    |
|       | Suspicion of fetal anaemia                    | 36 | Close monitoring.                                                                                                  | Possible                | False positive. Suspicion of fetal anaemia (MCA>95) was discarded. after delivery. |
|       | Asthenia                                      | 16 | Non-specific treatment.                                                                                            | Possible                |                                                                                    |
| 5     | Constipation                                  | 19 | Laxant.                                                                                                            | Possible                |                                                                                    |
|       | Itching                                       | 31 | Polaramine.                                                                                                        | Possible                |                                                                                    |
|       | Preterm threatened labour                     | 33 | Admission. Tocolytic treatment administration and fetal lung maturation. Anticipation of termination of pregnancy. | Possible                | Chemotherapy-induced stress.                                                       |
|       | Preterm rupture of membranes                  |    |                                                                                                                    |                         |                                                                                    |
|       |                                               |    |                                                                                                                    |                         |                                                                                    |
| 6     | Cervical shortening                           | 30 | Admission. Fetal lung maturation and fetal neuroprotection                                                         | Possible                | Chemotherapy-induced stress.                                                       |
|       | Nauseas                                       | 32 | Antiemetic treatment.                                                                                              | Possible                |                                                                                    |
|       | Anaemia                                       | 32 | Intravenous iron.                                                                                                  | Possible                |                                                                                    |
| 7     | Nauseas                                       | 5  | Antiemetic treatment.                                                                                              | No                      | Clinical manifestation prior to chemotherapy.                                      |
|       | Vomit                                         | 18 | Antiemetic treatment.                                                                                              | Possible                | Secondary to chemotherapy. Appeared after the first administration of AC.          |
|       | Xeroderma                                     | 30 | Skin hidratação.                                                                                                   | Possible                |                                                                                    |
|       | Pruritus / Itching                            | 30 | Antihistaminic treatment,                                                                                          | Possible                |                                                                                    |
|       |                                               |    |                                                                                                                    |                         |                                                                                    |
| 8     | Constipation                                  | 30 | Laxant.                                                                                                            | Possible                |                                                                                    |
|       | Gastritis                                     | 30 | Ranitidina.                                                                                                        | Possible                |                                                                                    |
| 10    | Nauseas                                       | 23 | Antiemetic treatment.                                                                                              | Possible                |                                                                                    |
|       | Constipation                                  | 32 | Laxant.                                                                                                            | Possible                |                                                                                    |
|       | Heartburn                                     | 30 | Ranitidine.                                                                                                        | Possible                |                                                                                    |
|       | Gestational diabetes                          | 33 | Insulinotherapy.                                                                                                   | No                      | Previous gestational diabetes antecedent                                           |
|       | Asthenia                                      | 33 | Admission. Patient rest.                                                                                           | Possible                |                                                                                    |

|    |                            |        |                                      |          |                                                                                   |
|----|----------------------------|--------|--------------------------------------|----------|-----------------------------------------------------------------------------------|
|    | Suspicion of fetal anaemia | 35     | Close monitoring                     | Possible | False positive. Suspicion of fetal anaemia (MCA>95) was discarded after delivery. |
|    | Asthenia                   | 27     | Non-specific treatment.              | Possible |                                                                                   |
| 11 | Xerostomia (Dry mouth)     | 27     | Non-specific treatment.              | Possible |                                                                                   |
|    | Anaemia                    | 23, 28 | Transfusion and iron administration. | Possible |                                                                                   |
| 12 | Asthenia                   | 23     | Non-specific treatment.              | Possible |                                                                                   |
|    | Suspicion of fetal anaemia | 30     | Admission. Close monitoring.         | Possible | False positive. Suspicion of fetal anaemia (MCA>90) was discarded after delivery. |
